# Supplementary material for: Evaluation of Rapid Multiplex Reverse Transcription-Quantitative Polymerase Chain Reaction Assays for SARS-CoV-2 Detection in Individual and Pooled Samples
Source: MDPI journal article supplement (doi:10.3390/life13081717), 2023-08-10
Supplement: s1 [file s1]

Supplementary Materials

**Supplementary Table S1.** Evaluation of the clinical performance of cut-off value in individual samples.

| Assay         | Cut-Off  | STANDARD M |    |    |     | Sensitivity %<br>(95% CI) | PPV %<br>(95% CI)      |
|---------------|----------|------------|----|----|-----|---------------------------|------------------------|
|               |          | TP         | FP | FN | TN  |                           |                        |
| Real-Q Direct | Ct<30.27 | 422        | 1  | -  | -   | 100<br>(99.13–100)        | 99.8<br>(98.69–99.99)  |
|               | 30.27≤Ct | 91         | 2  | 9  | 608 | 91.00<br>(83.60–95.80)    | 97.85<br>(92.45–99.74) |
| Allplex™ fast | Ct<30.81 | 445        | 1  | -  | -   | 100<br>(99.17–100)        | 99.8<br>(98.76–99.99)  |
|               | 30.81≤Ct | 66         | -  | 11 | 610 | 85.71<br>(75.87–92.65)    | 100<br>(94.56–100)     |
